# Supplementary material
Source: publisher figshare collection journal article supplement (https://frontiersin.figshare.com/ndownloader/files/14462450)
Supplement: Supplementary file 1 [file 14462450]

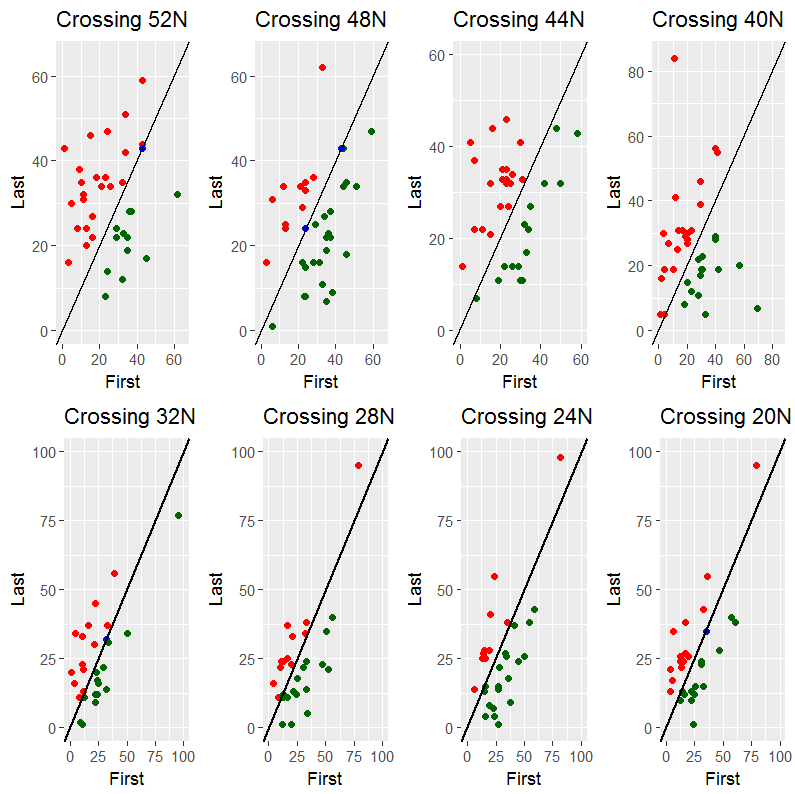
**Figure S1a:** Individual change between years in the timing of crossing latitudinal boundaries on southward migration. The x-axis is the earliest observed crossing of an individual, while the y-axis is the latest observed crossing of the same individual. The black line indicates those scenarios where the earliest observation of an individual crossing a boundary is at the exact same date as the latest observation of that same individual crossing that boundary. As a result, individuals that crossed later during the latest observation are above the black line (in red), those that crossed earlier are below the black line (in green), and those that had the exact same timing are on the black line (in blue). The figure shows that the timing of individuals does not always become earlier or later for a certain crossing.

**Figure S1b:** Individual change between years in the timing of crossing latitudinal boundaries on northward migration. The x-axis is the earliest observed crossing of an individual, while the y-axis is the latest observed crossing of the same individual. The black line indicates those scenarios where the earliest observation of an individual crossing a boundary is at the exact same date as the latest observation of that same individual crossing that boundary. As a result, individuals that crossed later during the latest observation are above the black line (in red), those that crossed earlier are below the black line (in green), and those that had the exact same timing are on the black line (in blue). The figure shows that the timing of individuals does not always become earlier or later for a certain crossing.
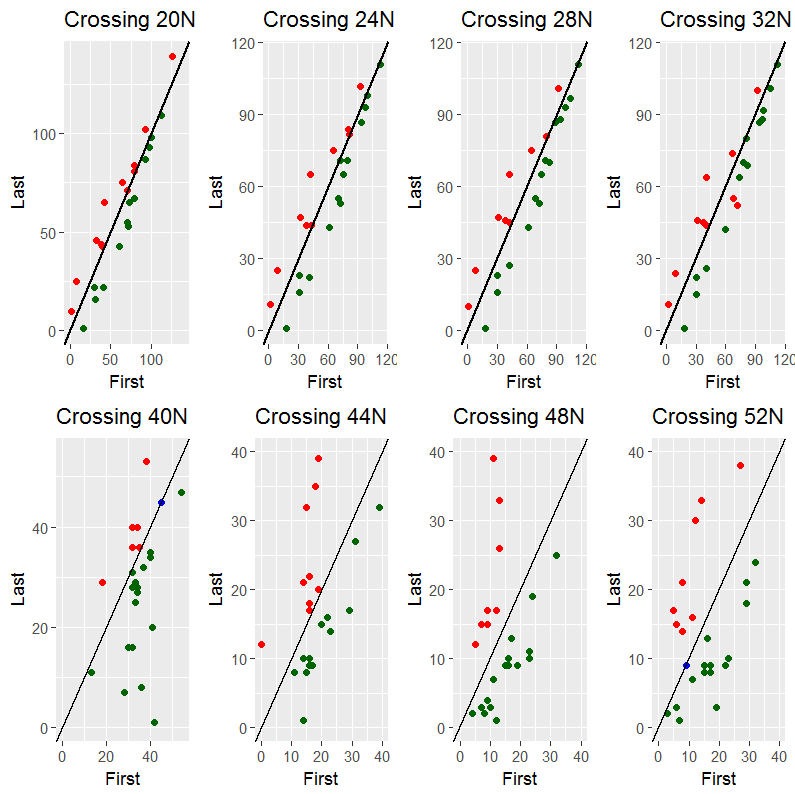


**Figure S2:** Presentation of the variation among individuals in the timing of southward and northward migration in 2012-2017. Red lines represent females and blue lines represent males. Individuals that crossed the Sahara are shown with purple dots, while individuals that did not cross the Sahara are shown with green dots. Note that the timing of crossing the spatial boundary at 36°N is excluded from the analyses and figures.

southward 2012

southward 2013

southward 2014

southward 2015

southward 2016

northward 2013

northward 2014

northward 2015

northward 2016

northward 2017
